# Supplementary material for: Avian Metapneumovirus Subgroup C Induces Mitochondrial Antiviral Signaling Protein Degradation through the Ubiquitin-Proteasome Pathway
Source: MDPI journal article supplement (doi:10.3390/v13101990), 2021-10-04
Supplement: s1 [file s1]

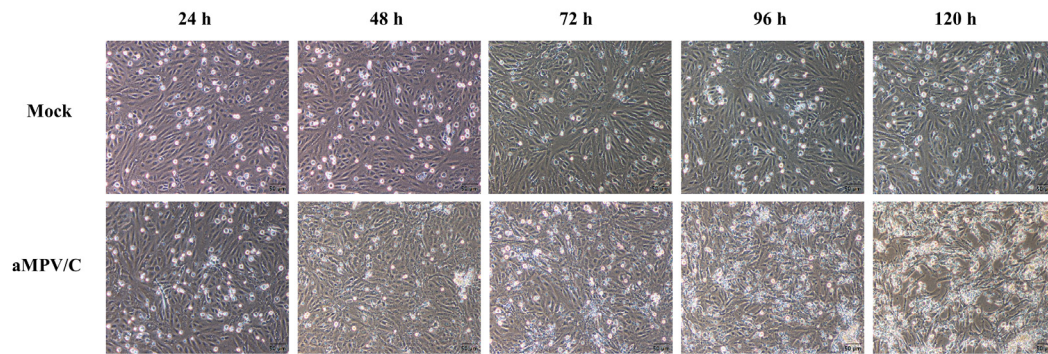

Figure S1. aMPV/C infection in Vero cells. The cytopathic effects (CPEs) caused by aMPV/C in Vero cells and mock-infected cells at 24, 48, 72, 96 and 120 h. Scale bars: 50  $\mu$ m.
